# Supplementary material
Source: publisher figshare collection journal article supplement (https://sage.figshare.com/ndownloader/files/45119248)
Supplement: Supplementary file 1 [file 45119248]

BIỂU MẪU THU THẬP SỐ LIỆU (DATA COLLECTION FORM)

**A. THÔNG TIN CHUNG CỦA NGƯỜI THAM GIA NGHIÊN CỨU** (DEMOGRAPHIC INFORMATION)

1. Email (ump.edu.vn)

………………………………………………………

1. Giới tính (Genders)

**** Nam (male)

**** Nữ (female)

1. Nơi sinh sống (living places)

**** Miền Nam (South)

**** Miền Bắc (North)

**** Miền Trung (Middle)

6. Học lực của Anh/Chị/Bạn trong học kì gần nhất: (Performance levels)

**** Xuất sắc

**** Giỏi

**** Khá

**** Trung bình

**B. THÔNG TIN VỀ TRẦM CẢM (PHQ – 9)**

Anh/Chị/Bạn hãy xác định Anh/Chị/Bạn có bất kỳ vấn đề nào sau đây và mức độ các vấn đề này làm phiền Anh/Chị/Bạn **trong 2 tuần vừa qua (**Frequency of these feelings during the past 2 weeks**)**

1. Bạn cảm thấy ít hứng thú hay thoả mãn khi làm việc gì đó

**** Không có **** Vài ngày **** Quá nửa số ngày trong tuần **** Hầu như mọi ngày

1. Cảm thấy chán nản, buồn rầu và vô vọng

**** Không có **** Vài ngày **** Quá nửa số ngày trong tuần **** Hầu như mọi ngày

1. Khó vào giấc ngủ, khó duy trì giấc ngủ hoặc ngủ quá nhiều

**** Không có **** Vài ngày **** Quá nửa số ngày trong tuần **** Hầu như mọi ngày

1. Cảm thấy mệt hoặc ít năng lượng

**** Không có **** Vài ngày **** Quá nửa số ngày trong tuần **** Hầu như mọi ngày

1. Chán ăn hoặc ăn quá nhiều

**** Không có **** Vài ngày **** Quá nửa số ngày trong tuần **** Hầu như mọi ngày

1. Cảm thấy bản thân tệ hại hoặc thất bại hoặc mình khiến bản thân/gia đình chán nản

**** Không có **** Vài ngày **** Quá nửa số ngày trong tuần **** Hầu như mọi ngày

1. Khó tập trung vào việc đang làm, ví dụ như đọc sách, đọc báo, xem ti vi

**** Không có **** Vài ngày **** Quá nửa số ngày trong tuần **** Hầu như mọi ngày

1. Vận động hoặc nói rất chậm đến mức người khác nhận thấy sự khác biệt; hoặc ngược lại, cảm thấy bồn chồn, bứt rứt đến mức đi tới đi lui nhiều hơn bình thường

**** Không có **** Vài ngày **** Quá nửa số ngày trong tuần **** Hầu như mọi ngày

1. Có suy nghĩ rằng tốt hơn mình nên chết đi hoặc suy nghĩ về việc tự làm tổn thương bản thân

**** Không có **** Vài ngày **** Quá nửa số ngày trong tuần **** Hầu như mọi ngày

**C. THÔNG TIN VỀ ĐỘNG LỰC CHỌN NGÀNH Y (CAREER CHOICE MOTIVATION QUESTIONNAIRE)**

Những câu sau đây là câu trả lời cho câu hỏi **“Vì sao Anh/Chị/Bạn chọn học Y khoa?”**. Xin vui lòng đọc kỹ và đánh giá mức độ chính xác của mỗi câu đối với bản thân theo thang điểm sau.

The following sentences are answers to the question **"Why did you choose to study Medicine?"**. Please read carefully and assess the accuracy of each sentence for yourself according to the following scale.

| 1 | 2 | 3 | 4 | 5 |
| --- | --- | --- | --- | --- |
| **Tuyệt đối không đúng** | **Đúng một chút** | **Khá đúng** | **Đúng phần lớn** | **Tuyệt đối đúng** |

1. Sau khi học có năng lực để được xã hội tôn trọng

It gives me competence to be socially respected

**** 1 **** 2 **** 3 **** 4 **** 5

1. Sau khi học có năng lực để kiếm sống.

It gives me competence to earn my living

**** 1 **** 2 **** 3 **** 4 **** 5

1. Tôi cảm thấy có đủ năng lực để theo đuổi chương trình học này.

I feel competent to pursue this program

**** 1 **** 2 **** 3 **** 4 **** 5

1. Nó mang lại cho tôi sự cảm thấy có năng lực để chăm sóc gia đình của mình.

It gives me competence to deliver care to my family

**** 1 **** 2 **** 3 **** 4 **** 5

1. Tôi quan tâm đến Khoa học Y tế.

I feel interested in Health Science

**** 1 **** 2 **** 3 **** 4 **** 5

1. Tôi hài lòng với Trường Đại học mà tôi đang học.

I satisfied with the University I am studying

**** 1 **** 2 **** 3 **** 4 **** 5

1. Tôi hài lòng với Y học, một lĩnh vực đầy thách thức.

I satisfied with Medicine which is a challenging field

**** 1 **** 2 **** 3 **** 4 **** 5

1. Việc làm đảm bảo.

a secured employment

**** 1 **** 2 **** 3 **** 4 **** 5

1. Cơ hội học tập ở nước ngoài.

Opportunities to study overseas

**** 1 **** 2 **** 3 **** 4 **** 5

1. Thu nhập cao.

high income

**** 1 **** 2 **** 3 **** 4 **** 5

1. Thăng chức

promoted position

**** 1 **** 2 **** 3 **** 4 **** 5

1. Lời khuyên của bố mẹ.

my parents’ advice

**** 1 **** 2 **** 3 **** 4 **** 5

1. Ý kiến của anh chị lớn.

siblings’ opinion

**** 1 **** 2 **** 3 **** 4 **** 5

1. Nguyện vọng của bố mẹ.

my parents’ wish

**** 1 **** 2 **** 3 **** 4 **** 5

1. Ý kiến của người khác.

Others’ opinion

**** 1 **** 2 **** 3 **** 4 **** 5

1. Nghề Y tế uy tín.

An influential health profession **** 1 **** 2 **** 3 **** 4 **** 5
